# Supplementary material
Source: publisher figshare collection journal article supplement (https://acs.figshare.com/ndownloader/files/3710767)
Supplement: Supplementary file 1 [file 3710767]

## Supporting information

# Similar but Different: The Case of Metoprolol Tartrate and Succinate Salts

*Paola Paoli,<sup>a,\*</sup> Patrizia Rossi,<sup>a</sup> Eleonora Macedi,<sup>a,†</sup> Andrea Ienco,<sup>b</sup> Laura Chelazzi,<sup>c</sup> Gian Luca Bartolucci,<sup>d</sup> Bruno Bruni.<sup>d</sup>*

<sup>a</sup>Department of Industrial Engineering, University of Florence, via S. Marta 3, 50139 Florence, Italy.

<sup>b</sup>CNR-ICCOM, via Madonna del Piano 10, 50019 Sesto Fiorentino, Florence, Italy.

<sup>c</sup>Centro di Cristallografia Strutturale (CRIST), University of Florence, via della Lastruccia 3, 50019 Sesto Fiorentino, Florence, Italy.

<sup>d</sup>NEUROFARBA - Department of Neurosciences, Psychology, Drug Research and Child Health, Section of Pharmaceutical and Nutraceutical Sciences, University of Florence, via U. Schiff 6, 50019 Sesto Fiorentino, Florence, Italy.

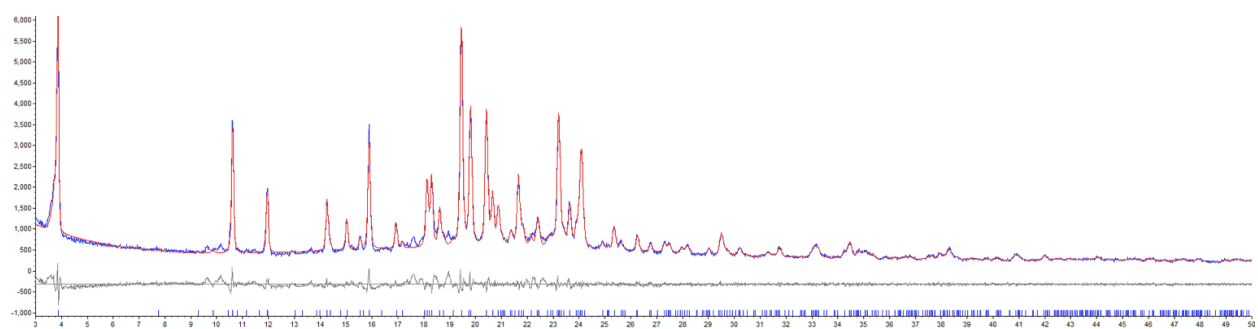

**Figure S1.** Experimental, calculated and difference diffraction patterns of MT-o.

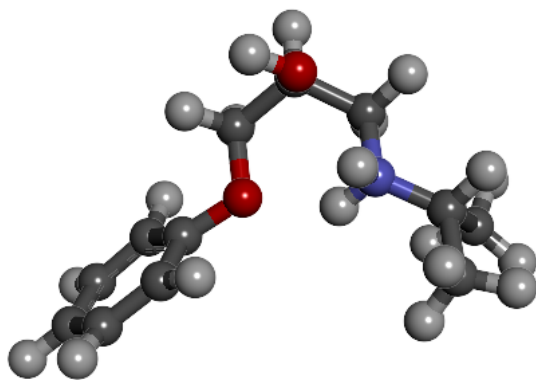

**Figure S2.** The “doubly-folded” conformation of the metoprolol cation model as found from MD simulations in vacuum at 300 K.

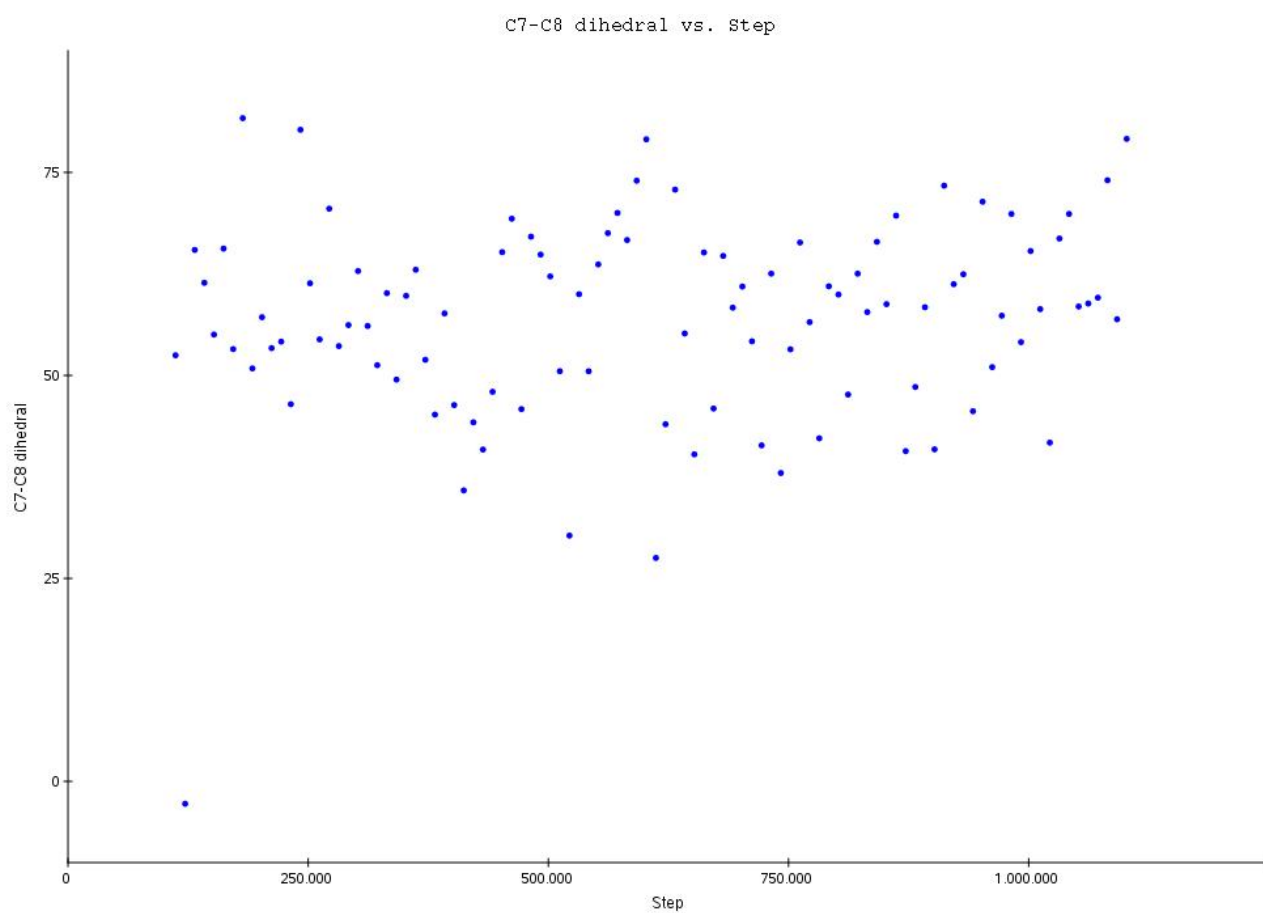

**Figure S3.** Plot of the C7-C8 dihedral angle ( $^{\circ}$ ) from MD trajectory (in vacuum,  $T=300\text{K}$ ).

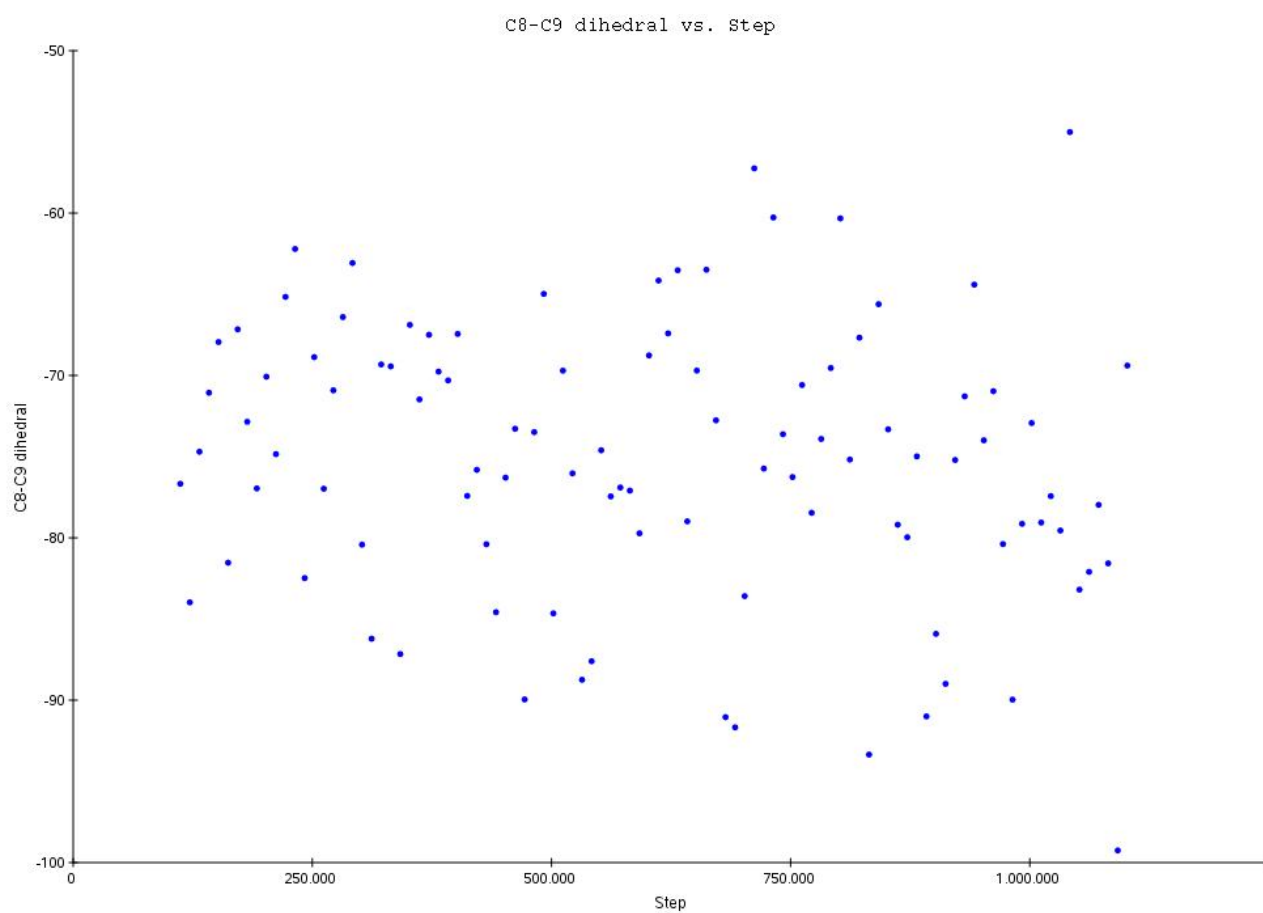

**Figure S4.** Plot of the C8-C9 dihedral angle ( $^{\circ}$ ) from MD trajectory (in vacuum,  $T=300\text{K}$ ).

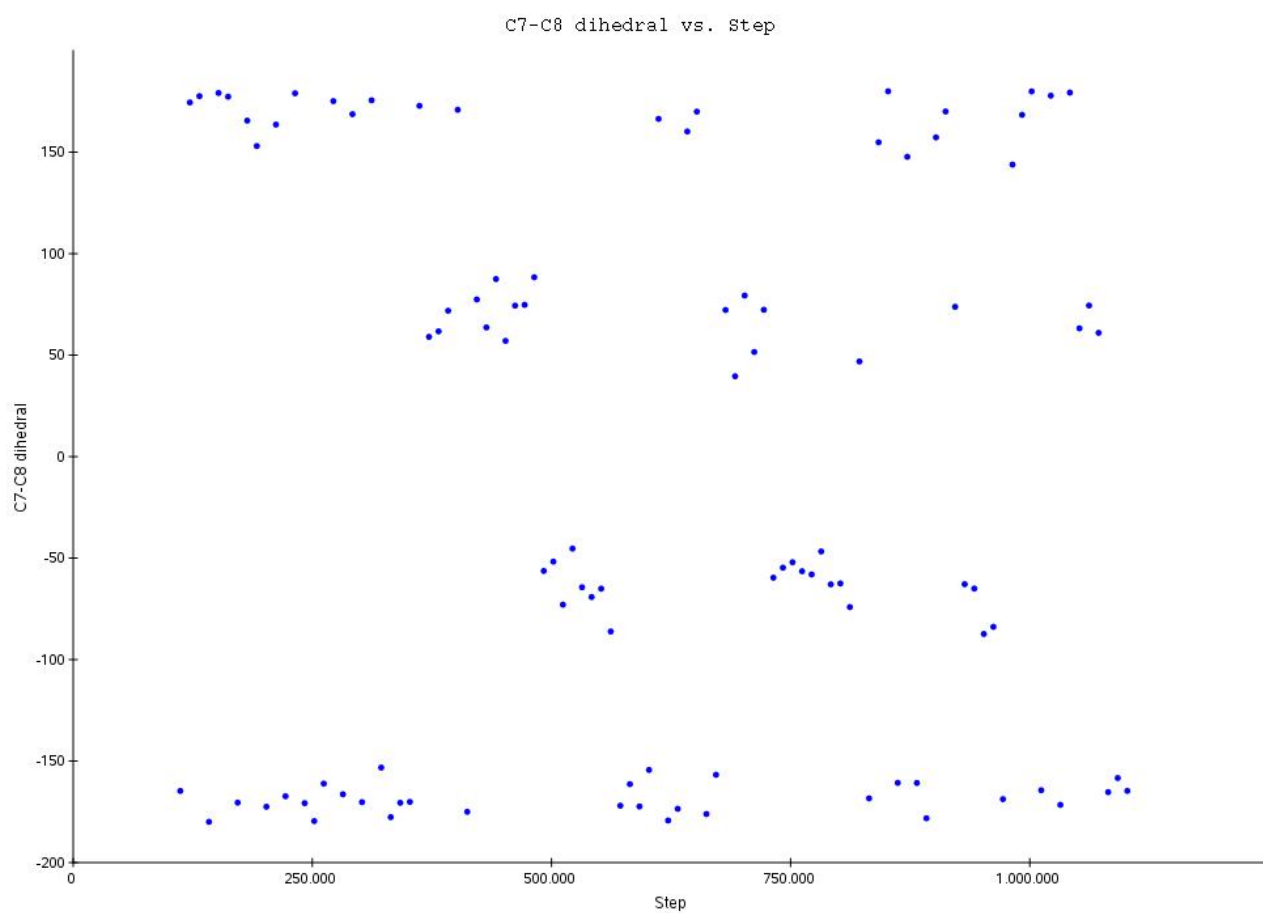

**Figure S5.** Plot of the C7-C8 dihedral angle ( $^{\circ}$ ) from MD trajectory (in an implicit water model,  $T=300\text{K}$ ).

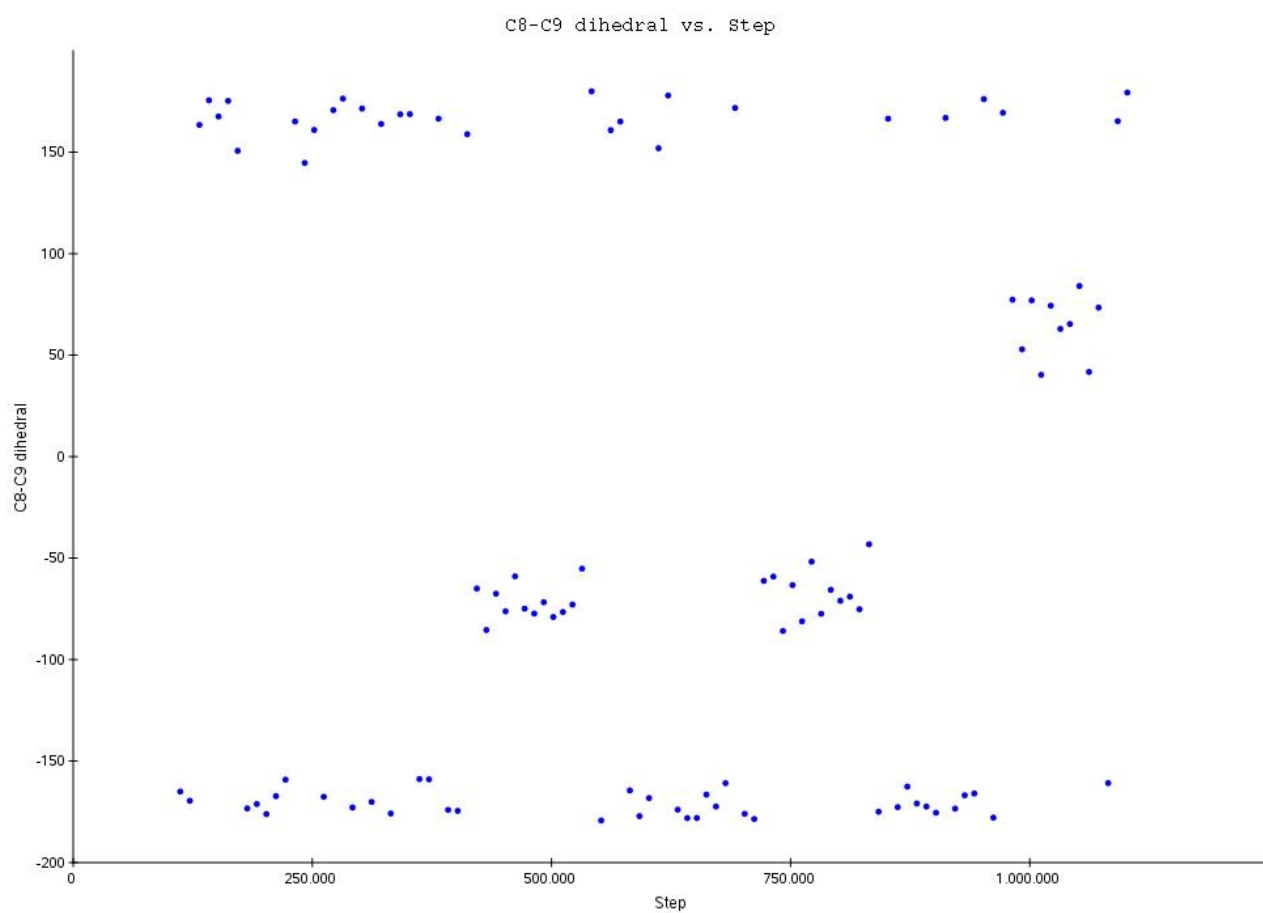

**Figure S6.** Plot of the C8-C9dihedral angle ( $^{\circ}$ ) from MD trajectory (in an implicit water model,  $T=300\text{K}$ ).

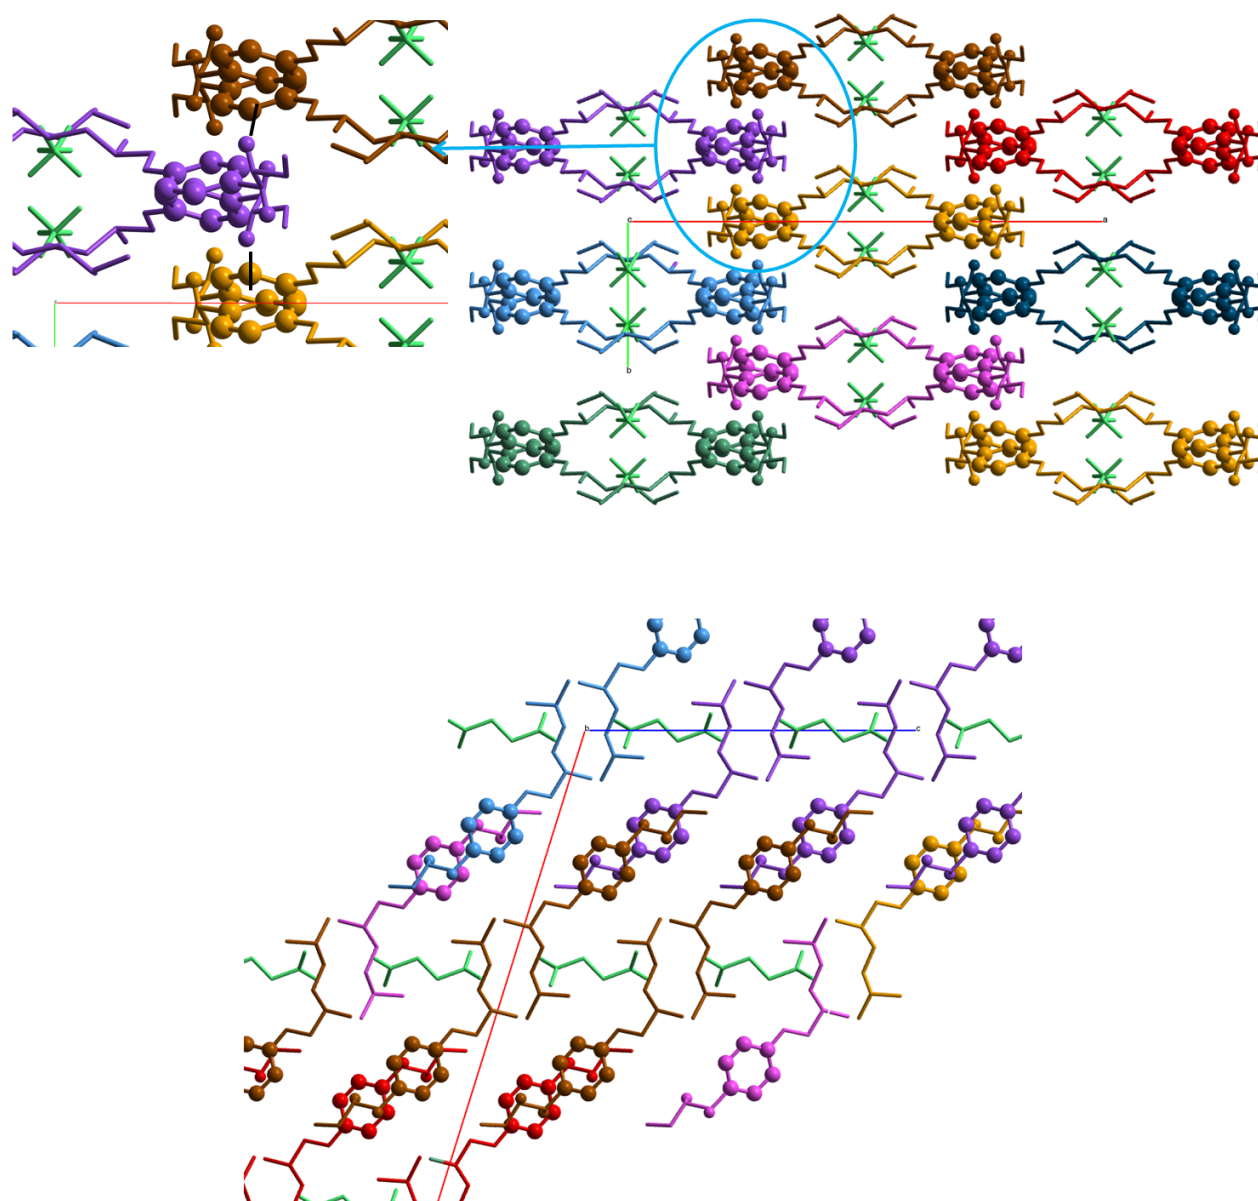

**Figure S7.** Crystal packing of **MS-m** along the *c* axis (top) and along the *b* axis (bottom). The atoms displayed as ball and stick are those involved in CH... $\pi$  interactions.



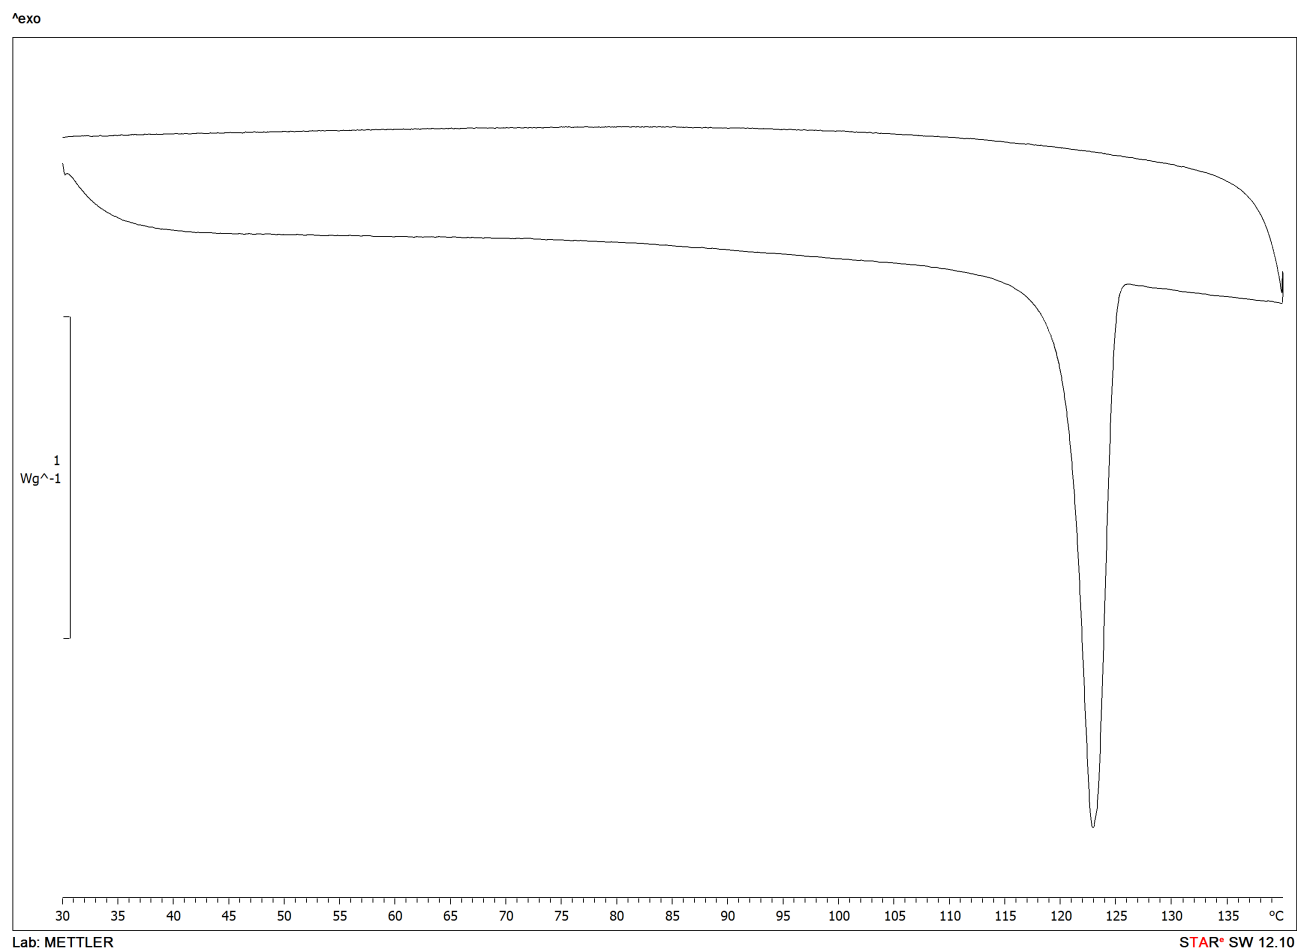

**Figure S8.** Experimental DSC curves of **MT-o** relative to the heating (bottom) and cooling (top) steps. The experiments were performed at a rate of 5 K/min.

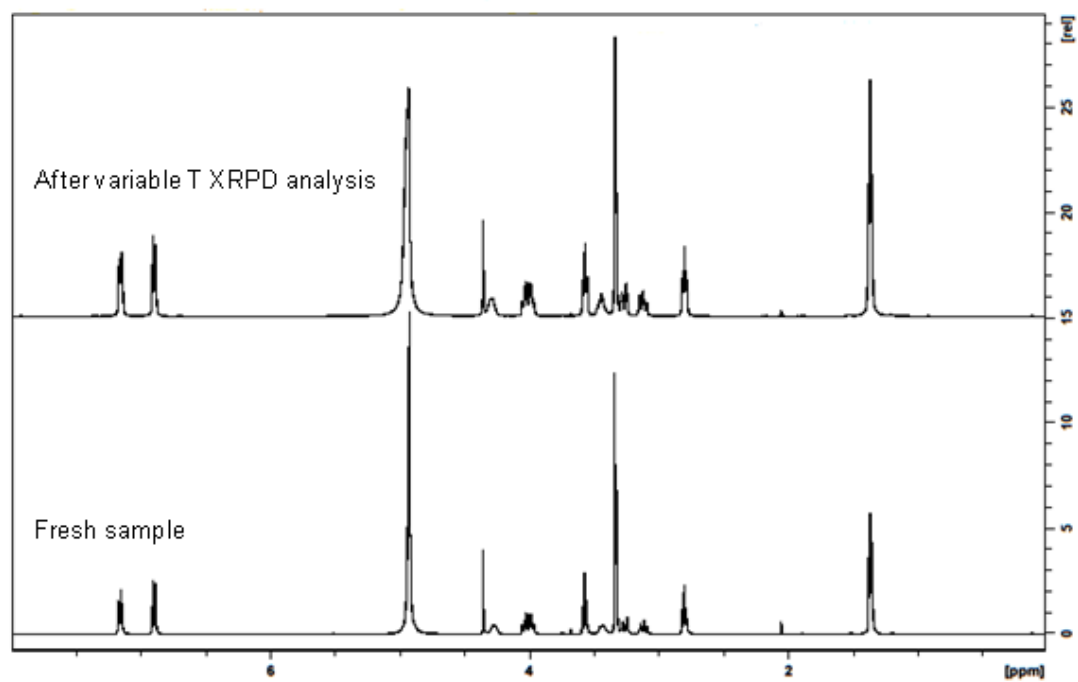

**Figure S9.**  $^1\text{H}$  NMR recorded in  $\text{CD}_3\text{OD}$  on **MT-o** samples as received from Sigma Aldrich and after recrystallization from the melt.

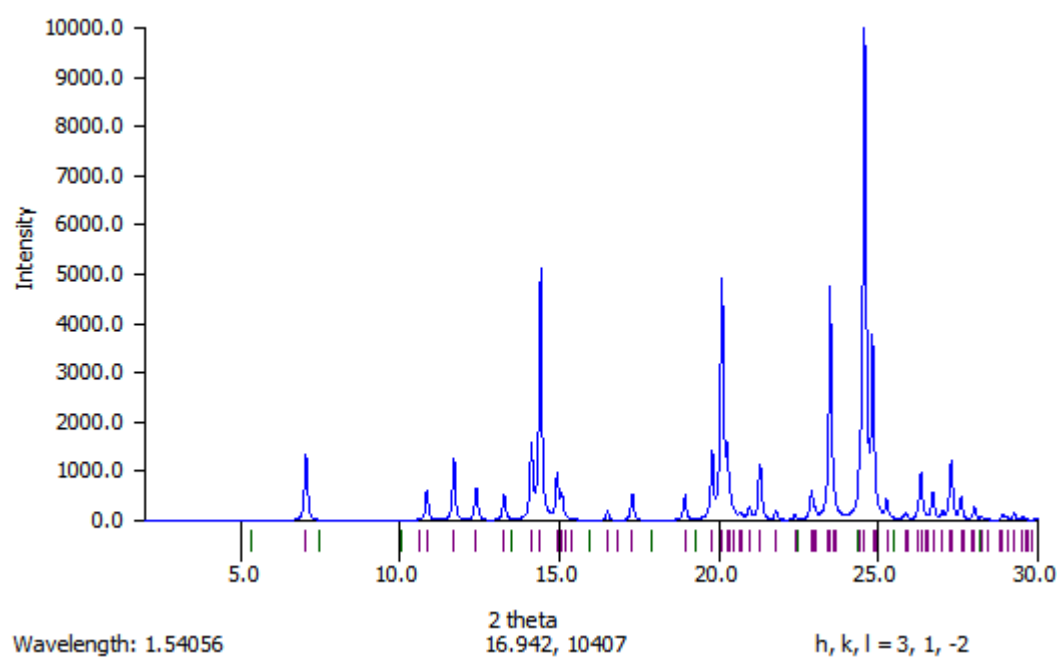

**Figure S10.** XRPD theoretical pattern (determined by using Mercury v.3.5, the data used are those deposited for **MS-m** in the CSD, refcode YOTXOV).

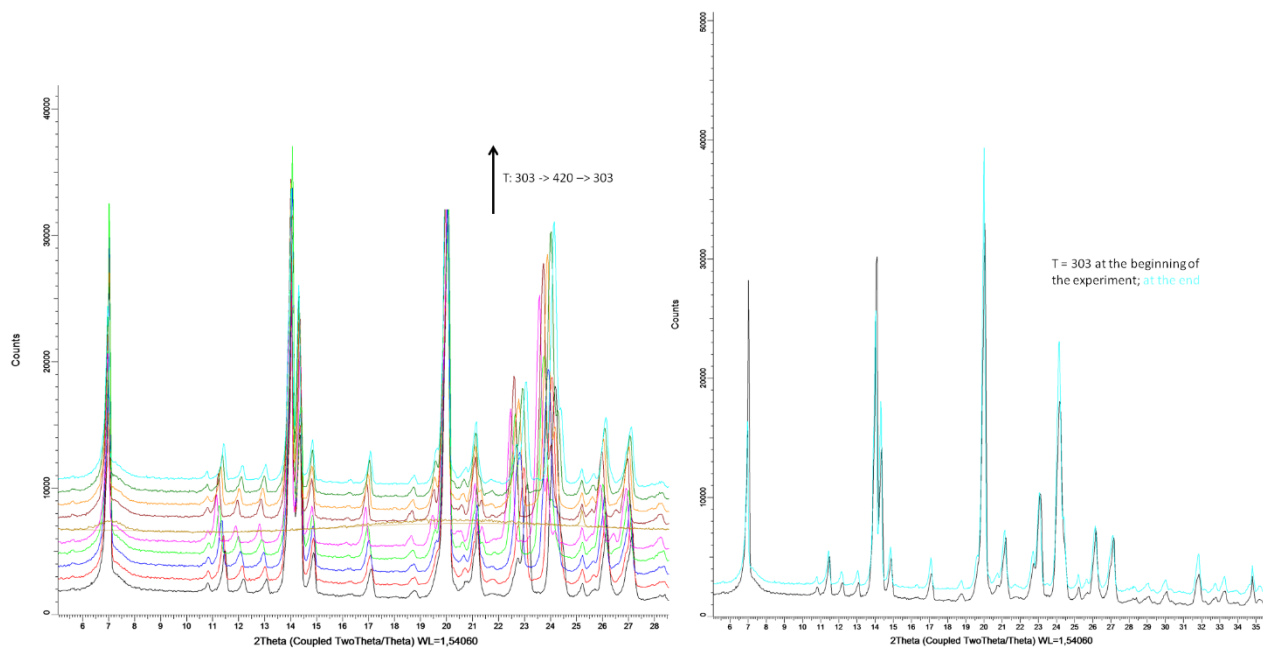

**Figure S11.** XRPD patterns of compound **MS-m** collected in the 303 – 420 – 303 K range (data were collected at 303, 323, 348, 373, 393, 420 K and 373, 348, 323, 303 K under nitrogen atmosphere). The anisotropic variation of the lattice is reversible as provided by the fact that the XRPD patterns collected at 303K at the beginning of the experiment and at the end are well superimposable.

**Table S1.** Intramolecular H-bonds in tartrate anions in **MT-o**.

|                             | X···Y (Å) | H···Y (Å) | X-H···Y (°) |
|-----------------------------|-----------|-----------|-------------|
| O6a-H6aa···O4a <sup>1</sup> | 2.62(2)   | 2.10      | 121         |
| O6b-H6bb···O5b <sup>2</sup> | 3.24(2)   | 2.65      | 130.3       |

<sup>1</sup> = -x+1,+y,-z+1; <sup>2</sup> = -x+1, y, -z+2
